# Supplementary material for: One-dimensional aluminum nanoparticle chains: the influence of interparticle spacing and chain length on plasmon coupling behavior
Source: Royal Society of Chemistry journal article supplement (doi:10.1039/c7tc00603a), 2017-01-01
Supplement: c7tc00603a1.pdf [file c7tc00603a1.pdf]

## Supplementary Information

### Plasmon One-Dimensional Aluminum Nanoparticle Chains: the Influence of Interparticle Spacing and Chain Length on the Plasmon Coupling Behavior

Junais Habeeb Mekkath and Joel Henzie

HENZIE.Joeladam@nims.go.jp

International Center for Materials Nanoarchitectonics (WPI-MANA), National  
Institute for Materials Science (NIMS) 1-1 Namiki, Ibaraki 305-0044, Tsukuba, Japan

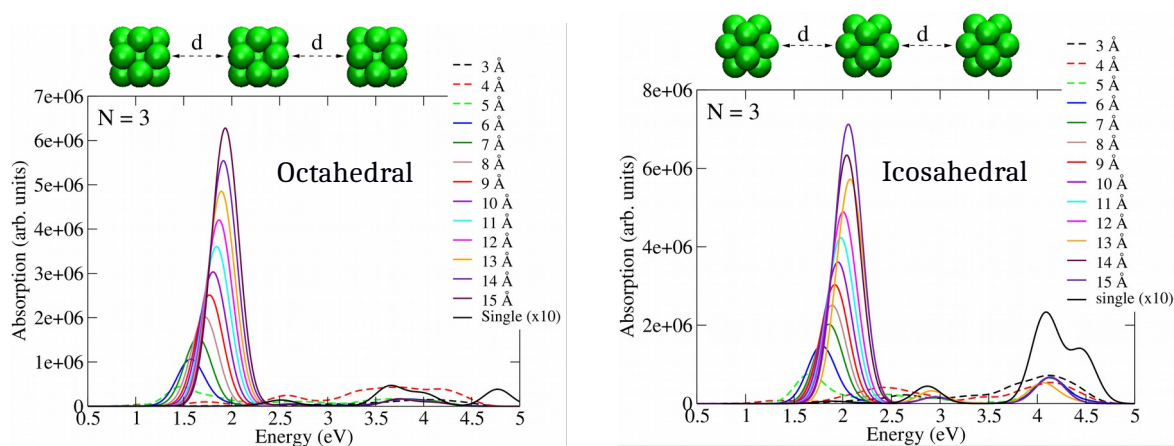

Figure S1: The absorption spectra of (small) octahedral and icosahedral nano-particle chains (chain length  $N = 3$  and each single nano-particle is around 6 Å) as a function of the inter-particle spacing  $d$ . The geometric structures are shown in the top region.
